# Supplementary material for: Analysis of the specificity of a COVID-19 antigen test in the Slovak mass testing program
Source: PubMed Central journal article supplement (PMC8320988; doi:10.1371/journal.pone.0255267), 2021-07-29
Supplement: pone.0255267.s001.pdf [file pone.0255267.s001.pdf]

## S1 Table

| County           | Number of tests | Number of positive Tests | Positivity rate | Lower bound | Upper bound | Standard error |
|------------------|-----------------|--------------------------|-----------------|-------------|-------------|----------------|
| Rožňava          | 34307           | 100                      | 0.29 %          | 0.20 %      | 0.40 %      | 0.03 %         |
| Revúca           | 21419           | 58                       | 0.27 %          | 0.17 %      | 0.41 %      | 0.04 %         |
| Bratislava IV    | 65861           | 229                      | 0.35 %          | 0.27 %      | 0.43 %      | 0.02 %         |
| Bratislava III   | 49788           | 175                      | 0.35 %          | 0.27 %      | 0.45 %      | 0.03 %         |
| Veľký Krtíš      | 24282           | 76                       | 0.31 %          | 0.20 %      | 0.46 %      | 0.04 %         |
| Bratislava V     | 66135           | 263                      | 0.40 %          | 0.32 %      | 0.49 %      | 0.02 %         |
| Banská Štiavnica | 11695           | 33                       | 0.28 %          | 0.14 %      | 0.49 %      | 0.05 %         |
| Bratislava I     | 28614           | 103                      | 0.36 %          | 0.25 %      | 0.50 %      | 0.04 %         |
| Bratislava II    | 80958           | 345                      | 0.43 %          | 0.35 %      | 0.51 %      | 0.02 %         |
| Rimavská Sobota  | 46872           | 196                      | 0.42 %          | 0.32 %      | 0.53 %      | 0.03 %         |
| Galanta          | 64841           | 303                      | 0.47 %          | 0.38 %      | 0.57 %      | 0.03 %         |
| Žiar nad Hronom  | 25816           | 108                      | 0.42 %          | 0.29 %      | 0.57 %      | 0.04 %         |
| Senec            | 71566           | 351                      | 0.49 %          | 0.41 %      | 0.59 %      | 0.03 %         |
| Piešťany         | 39080           | 185                      | 0.47 %          | 0.36 %      | 0.60 %      | 0.03 %         |
| Košice III       | 11109           | 41                       | 0.37 %          | 0.20 %      | 0.61 %      | 0.06 %         |
| Levice           | 66411           | 340                      | 0.51 %          | 0.42 %      | 0.61 %      | 0.03 %         |
| Nové Zámky       | 83224           | 436                      | 0.52 %          | 0.44 %      | 0.61 %      | 0.03 %         |
| Malacky          | 54585           | 285                      | 0.52 %          | 0.42 %      | 0.64 %      | 0.03 %         |
| Pezinok          | 45801           | 240                      | 0.52 %          | 0.42 %      | 0.65 %      | 0.03 %         |
| Lučenec          | 40576           | 213                      | 0.52 %          | 0.41 %      | 0.66 %      | 0.04 %         |
| Košice IV        | 26992           | 135                      | 0.50 %          | 0.37 %      | 0.66 %      | 0.04 %         |
| Trebišov         | 61297           | 353                      | 0.58 %          | 0.48 %      | 0.69 %      | 0.03 %         |
| Košice - okolie  | 86759           | 524                      | 0.60 %          | 0.52 %      | 0.70 %      | 0.03 %         |
| Trnava           | 86220           | 532                      | 0.62 %          | 0.53 %      | 0.71 %      | 0.03 %         |
| Košice I         | 31728           | 187                      | 0.59 %          | 0.45 %      | 0.75 %      | 0.04 %         |
| Krupina          | 12975           | 66                       | 0.51 %          | 0.32 %      | 0.76 %      | 0.06 %         |
| Hlohovec         | 28475           | 171                      | 0.60 %          | 0.46 %      | 0.77 %      | 0.05 %         |
| Nitra            | 107411          | 738                      | 0.69 %          | 0.60 %      | 0.78 %      | 0.03 %         |

| County               | Number of tests | Number of positive Tests | Positivity rate | Lower bound | Upper bound | Standard error |
|----------------------|-----------------|--------------------------|-----------------|-------------|-------------|----------------|
| Zlaté Moravce        | 26056           | 156                      | 0.60 %          | 0.45 %      | 0.78 %      | 0.05 %         |
| Šaľa                 | 31993           | 199                      | 0.62 %          | 0.48 %      | 0.79 %      | 0.04 %         |
| Komárno              | 66187           | 457                      | 0.69 %          | 0.59 %      | 0.81 %      | 0.03 %         |
| Poltár               | 12455           | 71                       | 0.57 %          | 0.37 %      | 0.84 %      | 0.07 %         |
| Zvolen               | 38254           | 274                      | 0.72 %          | 0.58 %      | 0.88 %      | 0.04 %         |
| Žarnovica            | 15918           | 105                      | 0.66 %          | 0.46 %      | 0.91 %      | 0.06 %         |
| Košice II            | 39314           | 295                      | 0.75 %          | 0.61 %      | 0.91 %      | 0.04 %         |
| Gelnica              | 17755           | 129                      | 0.73 %          | 0.53 %      | 0.97 %      | 0.06 %         |
| Michalovce           | 58929           | 512                      | 0.87 %          | 0.74 %      | 1.01 %      | 0.04 %         |
| Myjava               | 17753           | 139                      | 0.78 %          | 0.58 %      | 1.04 %      | 0.07 %         |
| Nové Mesto nad Váhom | 40829           | 363                      | 0.89 %          | 0.74 %      | 1.06 %      | 0.05 %         |
| Dunajská Streda      | 87090           | 840                      | 0.96 %          | 0.86 %      | 1.08 %      | 0.03 %         |
| Senica               | 40675           | 384                      | 0.94 %          | 0.79 %      | 1.12 %      | 0.05 %         |
| Prešov               | 99798           | 1031                     | 1.03 %          | 0.93 %      | 1.15 %      | 0.03 %         |
| Banská Bystrica      | 62169           | 669                      | 1.08 %          | 0.94 %      | 1.22 %      | 0.04 %         |
| Vranov nad Topľou    | 43552           | 460                      | 1.06 %          | 0.90 %      | 1.23 %      | 0.05 %         |
| Detva                | 19629           | 211                      | 1.07 %          | 0.84 %      | 1.35 %      | 0.07 %         |
| Turčianske Teplice   | 11287           | 112                      | 0.99 %          | 0.70 %      | 1.35 %      | 0.09 %         |
| Žilina               | 103957          | 1288                     | 1.24 %          | 1.13 %      | 1.36 %      | 0.03 %         |
| Trenčín              | 73424           | 894                      | 1.22 %          | 1.08 %      | 1.36 %      | 0.04 %         |
| Ilava                | 37604           | 442                      | 1.18 %          | 0.99 %      | 1.38 %      | 0.06 %         |
| Sobrance             | 12986           | 135                      | 1.04 %          | 0.76 %      | 1.38 %      | 0.09 %         |
| Brezno               | 36779           | 447                      | 1.22 %          | 1.03 %      | 1.42 %      | 0.06 %         |
| Skalica              | 29223           | 368                      | 1.26 %          | 1.05 %      | 1.50 %      | 0.07 %         |
| Martin               | 56533           | 771                      | 1.36 %          | 1.20 %      | 1.54 %      | 0.05 %         |
| Spišská Nová Ves     | 53976           | 738                      | 1.37 %          | 1.20 %      | 1.55 %      | 0.05 %         |
| Považská Bystrica    | 37822           | 505                      | 1.34 %          | 1.14 %      | 1.55 %      | 0.06 %         |
| Stropkov             | 10494           | 125                      | 1.19 %          | 0.86 %      | 1.60 %      | 0.11 %         |
| Liptovský Mikuláš    | 45606           | 640                      | 1.40 %          | 1.22 %      | 1.60 %      | 0.06 %         |
| Svidník              | 16631           | 220                      | 1.32 %          | 1.04 %      | 1.65 %      | 0.09 %         |
| Dolný Kubín          | 24029           | 345                      | 1.44 %          | 1.19 %      | 1.72 %      | 0.08 %         |

| County               | Number of tests | Number of positive Tests | Positivity rate | Lower bound | Upper bound | Standard error |
|----------------------|-----------------|--------------------------|-----------------|-------------|-------------|----------------|
| Bytča                | 21059           | 311                      | 1.48 %          | 1.21 %      | 1.78 %      | 0.08 %         |
| Medzilaborce         | 6980            | 91                       | 1.30 %          | 0.89 %      | 1.83 %      | 0.14 %         |
| Topoľčany            | 45129           | 755                      | 1.67 %          | 1.47 %      | 1.89 %      | 0.06 %         |
| Bardejov             | 43562           | 728                      | 1.67 %          | 1.47 %      | 1.89 %      | 0.06 %         |
| Poprad               | 59072           | 1059                     | 1.79 %          | 1.61 %      | 1.99 %      | 0.05 %         |
| Námestovo            | 36661           | 670                      | 1.83 %          | 1.60 %      | 2.08 %      | 0.07 %         |
| Humenné              | 32632           | 598                      | 1.83 %          | 1.59 %      | 2.10 %      | 0.07 %         |
| Kežmarok             | 43959           | 845                      | 1.92 %          | 1.71 %      | 2.16 %      | 0.07 %         |
| Snina                | 19122           | 345                      | 1.80 %          | 1.49 %      | 2.16 %      | 0.10 %         |
| Partizánske          | 26359           | 490                      | 1.86 %          | 1.59 %      | 2.16 %      | 0.08 %         |
| Ružomberok           | 33048           | 626                      | 1.89 %          | 1.65 %      | 2.16 %      | 0.07 %         |
| Kysucké Nové Mesto   | 20605           | 383                      | 1.86 %          | 1.55 %      | 2.20 %      | 0.09 %         |
| Prievidza            | 77918           | 1596                     | 2.05 %          | 1.88 %      | 2.23 %      | 0.05 %         |
| Bánovce nad Bebravou | 23128           | 455                      | 1.97 %          | 1.67 %      | 2.30 %      | 0.09 %         |
| Levoča               | 18344           | 373                      | 2.03 %          | 1.70 %      | 2.41 %      | 0.10 %         |
| Sabinov              | 35366           | 804                      | 2.27 %          | 2.01 %      | 2.56 %      | 0.08 %         |
| Tvrdošín             | 20200           | 448                      | 2.22 %          | 1.88 %      | 2.59 %      | 0.10 %         |
| Stará Ľubovňa        | 28749           | 805                      | 2.80 %          | 2.48 %      | 3.15 %      | 0.10 %         |
| Púchov               | 29455           | 830                      | 2.82 %          | 2.50 %      | 3.16 %      | 0.10 %         |
| Čadca                | 53907           | 1691                     | 3.14 %          | 2.89 %      | 3.40 %      | 0.08 %         |

S1 Table: County, number of tests, number of positive tests, positivity rates, simultaneous Bonferroni adjusted 95% confidence intervals, and standard errors of the positivity rates in the 79 counties. Counties are ordered from low to high incidence by the upper confidence bound. Data source [11].
